# Supplementary material for: Effects of Urolithin A on Mitochondrial Parameters in a Cellular Model of Early Alzheimer Disease
Source: MDPI journal article supplement (doi:10.3390/ijms22158333), 2021-08-03
Supplement: s1 [file s1]

**Supplementary Table S1:**

Statistical parameters for figures 2-5 and table 1 in the manuscript. A: Respiration of cells (Figure 2). B: Mitochondrial Membrane potential (Figure 2&3). C: Adenosine triphosphate (ATP) levels (Figure 2&3). D: Citrate synthase activity (Figure 3). E: Cellular ROS (Figure 3). F:  $A\beta_{1-40}$  levels of cells (Table 1). G: Results for qRT-PCR (Figure 4&5) H: Autophagy experiments (Figure 5) I: Western Blot experiments (Figure 2). Statistical evaluation was done Two-way ANOVA with false discovery rate correction according to Benjamini, Krieger and Yekutieli in A-H and student's t-test in I). Displayed are the adjusted p-values. Shown are mean  $\pm$  SEM. Statistical significance was given at <sup>ns</sup>p > 0.05; \*p < 0.05; \*\*p < 0.01; \*\*\*p < 0.001; \*\*\*\*p < 0.0001.

| A)<br>Respiration |                                                | Individual<br>p value | Adjusted p<br>value<br>(FDR corrected) |
|-------------------|------------------------------------------------|-----------------------|----------------------------------------|
| endogen           | ctrl:SY5Ymock vs. ctrl:SY5Yapp                 | < 0.0001              | < 0.0001 ****                          |
|                   | ctrl:SY5Ymock vs. UA 1 $\mu$ M:SY5Ymock        | 0.7682                | 0.2843 ns                              |
|                   | ctrl:SY5Ymock vs. UA 1 $\mu$ M:SY5Yapp         | < 0.0001              | < 0.0001 ****                          |
|                   | ctrl:SY5Yapp vs. UA 1 $\mu$ M:SY5Ymock         | < 0.0001              | < 0.0001 ****                          |
|                   | ctrl:SY5Yapp vs. UA 1 $\mu$ M:SY5Yapp          | 0.8123                | 0.2843 ns                              |
|                   | UA 1 $\mu$ M:SY5Ymock vs. UA 1 $\mu$ M:SY5Yapp | < 0.0001              | < 0.0001 ****                          |
| digitonine        | ctrl:SY5Ymock vs. ctrl:SY5Yapp                 | 0.0014                | 0.0010 **                              |
|                   | ctrl:SY5Ymock vs. UA 1 $\mu$ M:SY5Ymock        | 0.4338                | 0.1518 ns                              |
|                   | ctrl:SY5Ymock vs. UA 1 $\mu$ M:SY5Yapp         | < 0.0001              | < 0.0001 ****                          |
|                   | ctrl:SY5Yapp vs. UA 1 $\mu$ M:SY5Ymock         | 0.0108                | 0.0057 **                              |
|                   | ctrl:SY5Yapp vs. UA 1 $\mu$ M:SY5Yapp          | 0.3853                | 0.1518 ns                              |
|                   | UA 1 $\mu$ M:SY5Ymock vs. UA 1 $\mu$ M:SY5Yapp | 0.0005                | 0.0006 ***                             |
| CI (L)            | ctrl:SY5Ymock vs. ctrl:SY5Yapp                 | < 0.0001              | < 0.0001 ****                          |
|                   | ctrl:SY5Ymock vs. UA 1 $\mu$ M:SY5Ymock        | 0.6873                | 0.2405 ns                              |
|                   | ctrl:SY5Ymock vs. UA 1 $\mu$ M:SY5Yapp         | < 0.0001              | < 0.0001 ****                          |
|                   | ctrl:SY5Yapp vs. UA 1 $\mu$ M:SY5Ymock         | < 0.0001              | < 0.0001 ****                          |
|                   | ctrl:SY5Yapp vs. UA 1 $\mu$ M:SY5Yapp          | 0.6101                | 0.2405 ns                              |
|                   | UA 1 $\mu$ M:SY5Ymock vs. UA 1 $\mu$ M:SY5Yapp | < 0.0001              | < 0.0001 ****                          |
| CI (P)            | ctrl:SY5Ymock vs. ctrl:SY5Yapp                 | 0.0145                | 0.0153 *                               |
|                   | ctrl:SY5Ymock vs. UA 1 $\mu$ M:SY5Ymock        | 0.3816                | 0.2004 ns                              |
|                   | ctrl:SY5Ymock vs. UA 1 $\mu$ M:SY5Yapp         | 0.0005                | 0.0017 **                              |
|                   | ctrl:SY5Yapp vs. UA 1 $\mu$ M:SY5Ymock         | 0.1034                | 0.0814 ns                              |
|                   | ctrl:SY5Yapp vs. UA 1 $\mu$ M:SY5Yapp          | 0.2954                | 0.1861 ns                              |
|                   | UA 1 $\mu$ M:SY5Ymock vs. UA 1 $\mu$ M:SY5Yapp | 0.0074                | 0.0116 *                               |
| CI & CII (P)      | ctrl:SY5Ymock vs. ctrl:SY5Yapp                 | 0.0017                | 0.0012 **                              |
|                   | ctrl:SY5Ymock vs. UA 1 $\mu$ M:SY5Ymock        | 0.5171                | 0.1810 ns                              |
|                   | ctrl:SY5Ymock vs. UA 1 $\mu$ M:SY5Yapp         | < 0.0001              | 0.0001 ***                             |
|                   | ctrl:SY5Yapp vs. UA 1 $\mu$ M:SY5Ymock         | 0.0110                | 0.0058 **                              |
|                   | ctrl:SY5Yapp vs. UA 1 $\mu$ M:SY5Yapp          | 0.3390                | 0.1424 ns                              |
|                   | UA 1 $\mu$ M:SY5Ymock vs. UA 1 $\mu$ M:SY5Yapp | 0.0005                | 0.0006 ***                             |
| CI & CII (U)      | ctrl:SY5Ymock vs. ctrl:SY5Yapp                 | < 0.0001              | < 0.0001 ****                          |
|                   | ctrl:SY5Ymock vs. UA 1 $\mu$ M:SY5Ymock        | 0.4455                | 0.1559 ns                              |
|                   | ctrl:SY5Ymock vs. UA 1 $\mu$ M:SY5Yapp         | < 0.0001              | < 0.0001 ****                          |
|                   | ctrl:SY5Yapp vs. UA 1 $\mu$ M:SY5Ymock         | < 0.0001              | < 0.0001 ****                          |
|                   | ctrl:SY5Yapp vs. UA 1 $\mu$ M:SY5Yapp          | 0.4300                | 0.1559 ns                              |
|                   | UA 1 $\mu$ M:SY5Ymock vs. UA 1 $\mu$ M:SY5Yapp | < 0.0001              | < 0.0001 ****                          |
| CII (U)           | ctrl:SY5Ymock vs. ctrl:SY5Yapp                 | 0.0010                | 0.0007 ***                             |
|                   | ctrl:SY5Ymock vs. UA 1 $\mu$ M:SY5Ymock        | 0.5515                | 0.1930 ns                              |
|                   | ctrl:SY5Ymock vs. UA 1 $\mu$ M:SY5Yapp         | < 0.0001              | < 0.0001 ****                          |
|                   | ctrl:SY5Yapp vs. UA 1 $\mu$ M:SY5Ymock         | 0.0058                | 0.0031 **                              |

|         |                                    |          |               |
|---------|------------------------------------|----------|---------------|
| CII (L) | ctrl:SY5Yapp vs. UA 1µM:SY5Yapp    | 0.1045   | 0.0439 *      |
|         | UA 1µM:SY5Ymock vs. UA 1µM:SY5Yapp | < 0.0001 | < 0.0001 **** |
|         | ctrl:SY5Ymock vs. ctrl:SY5Yapp     | 0.0161   | 0.0169 *      |
|         | ctrl:SY5Ymock vs. UA 1µM:SY5Ymock  | 0.5296   | 0.2780 ns     |
|         | ctrl:SY5Ymock vs. UA 1µM:SY5Yapp   | 0.0003   | 0.0009 ***    |
|         | ctrl:SY5Yapp vs. UA 1µM:SY5Ymock   | 0.0716   | 0.0563 ns     |
|         | ctrl:SY5Yapp vs. UA 1µM:SY5Yapp    | 0.1969   | 0.1241 ns     |
| CIV (U) | UA 1µM:SY5Ymock vs. UA 1µM:SY5Yapp | 0.0023   | 0.0037 **     |
|         | ctrl:SY5Ymock vs. ctrl:SY5Yapp     | 0.0023   | 0.0016 **     |
|         | ctrl:SY5Ymock vs. UA 1µM:SY5Ymock  | 0.7392   | 0.2587 ns     |
|         | ctrl:SY5Ymock vs. UA 1µM:SY5Yapp   | < 0.0001 | < 0.0001 **** |
|         | ctrl:SY5Yapp vs. UA 1µM:SY5Ymock   | 0.0063   | 0.0033 **     |
|         | ctrl:SY5Yapp vs. UA 1µM:SY5Yapp    | 0.1009   | 0.0424 *      |
|         | UA 1µM:SY5Ymock vs. UA 1µM:SY5Yapp | < 0.0001 | < 0.0001 **** |

| <b>B)<br/>MMP</b>    |                                        | <b>Individual<br/>p value</b> | <b>Adjusted p<br/>value<br/>(FDR corrected)</b> |
|----------------------|----------------------------------------|-------------------------------|-------------------------------------------------|
| UA 1 µM              | ctrl:SY5Ymock vs. ctrl:SY5Yapp         | 0.0019                        | 0.0013 **                                       |
|                      | ctrl:SY5Ymock vs. UA 1 µM:SY5Ymock     | 0.7767                        | 0.2718 ns                                       |
|                      | ctrl:SY5Ymock vs. UA 1 µM:SY5Yapp      | 0.0003                        | 0.0007 ***                                      |
|                      | ctrl:SY5Yapp vs. UA 1 µM:SY5Ymock      | 0.0044                        | 0.0023 **                                       |
|                      | ctrl:SY5Yapp vs. UA 1 µM:SY5Yapp       | 0.5166                        | 0.2170 ns                                       |
|                      | UA 1 µM:SY5Ymock vs. UA 1 µM:SY5Yapp   | 0.0008                        | 0.0009 ***                                      |
| UA 10 µM             | ctrl10:SY5Ymock vs. ctrl10:SY5Yapp     | < 0.0001                      | < 0.0001 ****                                   |
|                      | ctrl10:SY5Ymock vs. UA 10 µM:SY5Ymock  | 0.3279                        | 0.1148 ns                                       |
|                      | ctrl10:SY5Ymock vs. UA 10 µM:SY5Yapp   | < 0.0001                      | < 0.0001 ****                                   |
|                      | ctrl10:SY5Yapp vs. UA 10 µM:SY5Ymock   | < 0.0001                      | < 0.0001 ****                                   |
|                      | ctrl10:SY5Yapp vs. UA 10 µM:SY5Yapp    | 0.0770                        | 0.0323 *                                        |
|                      | UA 10 µM:SY5Ymock vs. UA 10 µM:SY5Yapp | < 0.0001                      | < 0.0001 ****                                   |
| UA 1 µM<br>Rotenone  | ctrl:SY5Ymock vs. ctrl:SY5Yapp         | 0.0007                        | 0.0007 ***                                      |
|                      | ctrl:SY5Ymock vs. UA 1 µM:SY5Ymock     | 0.2527                        | 0.1061 ns                                       |
|                      | ctrl:SY5Ymock vs. UA 1 µM:SY5Yapp      | 0.0003                        | 0.0005 ***                                      |
|                      | ctrl:SY5Yapp vs. UA 1 µM:SY5Ymock      | 0.0185                        | 0.0097 **                                       |
|                      | ctrl:SY5Yapp vs. UA 1 µM:SY5Yapp       | 0.7205                        | 0.2522 ns                                       |
|                      | UA 1 µM:SY5Ymock vs. UA 1 µM:SY5Yapp   | 0.0081                        | 0.0057 **                                       |
| UA 10 µM<br>Rotenone | ctrl:SY5Ymock vs. ctrl:SY5Yapp         | < 0.0001                      | < 0.0001 ****                                   |
|                      | ctrl:SY5Ymock vs. UA 10 µM:SY5Ymock    | 0.7271                        | 0.2545 ns                                       |
|                      | ctrl:SY5Ymock vs. UA 10 µM:SY5Yapp     | < 0.0001                      | < 0.0001 ****                                   |
|                      | ctrl:SY5Yapp vs. UA 10 µM:SY5Ymock     | < 0.0001                      | < 0.0001 ****                                   |
|                      | ctrl:SY5Yapp vs. UA 10 µM:SY5Yapp      | 0.0620                        | 0.0260 *                                        |
|                      | UA 10 µM:SY5Ymock vs. UA 10 µM:SY5Yapp | < 0.0001                      | < 0.0001 ****                                   |

| <b>C)<br/>ATP</b> |                                      | <b>Individual<br/>p value</b> | <b>Adjusted p<br/>value<br/>(FDR corrected)</b> |
|-------------------|--------------------------------------|-------------------------------|-------------------------------------------------|
| UA 1 µM           | ctrl:SY5Ymock vs. ctrl:SY5Yapp       | < 0.0001                      | < 0.0001 ****                                   |
|                   | ctrl:SY5Ymock vs. UA 1µM:SY5Ymock    | 0.7024                        | 0.2503 ns                                       |
|                   | ctrl:SY5Ymock vs. UA 1µM:SY5Yapp     | < 0.0001                      | < 0.0001 ****                                   |
|                   | ctrl:SY5Yapp vs. UA 1µM:SY5Ymock     | < 0.0001                      | < 0.0001 ****                                   |
|                   | ctrl:SY5Yapp vs. UA 1µM:SY5Yapp      | 0.7151                        | 0.2503 ns                                       |
|                   | UA 1µM:SY5Ymock vs. UA 1µM:SY5Yapp   | < 0.0001                      | < 0.0001 ****                                   |
| UA 10 µM          | ctrl10:SY5Ymock vs. ctrl10:SY5Yapp   | < 0.0001                      | < 0.0001 ****                                   |
|                   | ctrl10:SY5Ymock vs. UA 10µM:SY5Ymock | 0.1911                        | 0.0803 ns                                       |

|                      |                                      |          |               |
|----------------------|--------------------------------------|----------|---------------|
|                      | ctrl10:SY5Ymock vs. UA 10μM:SY5Yapp  | < 0.0001 | < 0.0001 **** |
|                      | ctrl10:SY5Yapp vs. UA 10μM:SY5Ymock  | 0.0008   | 0.0004 ***    |
|                      | ctrl10:SY5Yapp vs. UA 10μM:SY5Yapp   | 0.4310   | 0.1508 ns     |
|                      | UA 10μM:SY5Ymock vs. UA 10μM:SY5Yapp | < 0.0001 | < 0.0001 **** |
| UA 1 μM<br>Rotenone  | ctrl:SY5Ymock vs. ctrl:SY5Yapp       | < 0.0001 | < 0.0001 **** |
|                      | ctrl:SY5Ymock vs. UA 1μM:SY5Ymock    | 0.0803   | 0.0337 *      |
|                      | ctrl:SY5Ymock vs. UA 1μM:SY5Yapp     | < 0.0001 | < 0.0001 **** |
|                      | ctrl:SY5Yapp vs. UA 1μM:SY5Ymock     | < 0.0001 | < 0.0001 **** |
|                      | ctrl:SY5Yapp vs. UA 1μM:SY5Yapp      | 0.8721   | 0.3053 ns     |
|                      | UA 1μM:SY5Ymock vs. UA 1μM:SY5Yapp   | < 0.0001 | < 0.0001 **** |
| UA 10 μM<br>Rotenone | ctrl10:SY5Ymock vs. ctrl10:SY5Yapp   | < 0.0001 | < 0.0001 **** |
|                      | ctrl10:SY5Ymock vs. UA 10μM:SY5Ymock | 0.0006   | 0.0002 ***    |
|                      | ctrl10:SY5Ymock vs. UA 10μM:SY5Yapp  | < 0.0001 | < 0.0001 **** |
|                      | ctrl10:SY5Yapp vs. UA 10μM:SY5Ymock  | 0.0010   | 0.0002 ***    |
|                      | ctrl10:SY5Yapp vs. UA 10μM:SY5Yapp   | 0.4880   | 0.0854 ns     |
|                      | UA 10μM:SY5Ymock vs. UA 10μM:SY5Yapp | 0.0001   | < 0.0001 **** |

| D) Citrate Synthase activity       | Individual p value | Adjusted p value (FDR corrected) |
|------------------------------------|--------------------|----------------------------------|
| ctrl:SY5Ymock vs. ctrl:SY5Yapp     | 0.0083             | 0.0522 ns                        |
| ctrl:SY5Ymock vs. UA 1μM:SY5Ymock  | 0.3283             | 0.4137 ns                        |
| ctrl:SY5Ymock vs. UA 1μM:SY5Yapp   | 0.0365             | 0.1150 ns                        |
| ctrl:SY5Yapp vs. UA 1μM:SY5Ymock   | 0.0628             | 0.1318 ns                        |
| ctrl:SY5Yapp vs. UA 1μM:SY5Yapp    | 0.4799             | 0.5039 ns                        |
| UA 1μM:SY5Ymock vs. UA 1μM:SY5Yapp | 0.2219             | 0.3495 ns                        |

| E) Cellular ROS assay              | Individual p value | Adjusted p value (FDR corrected) |
|------------------------------------|--------------------|----------------------------------|
| ctrl:SY5Ymock vs. ctrl:SY5Yapp     | 0.0239             | 0.1364 ns                        |
| ctrl:SY5Ymock vs. UA 1μM:SY5Ymock  | 0.6658             | 0.7674 ns                        |
| ctrl:SY5Ymock vs. UA 1μM:SY5Yapp   | 0.0493             | 0.1364 ns                        |
| ctrl:SY5Yapp vs. UA 1μM:SY5Ymock   | 0.0650             | 0.1364 ns                        |
| ctrl:SY5Yapp vs. UA 1μM:SY5Yapp    | 0.7308             | 0.7674 ns                        |
| UA 1μM:SY5Ymock vs. UA 1μM:SY5Yapp | 0.1230             | 0.1937 ns                        |

| F) Aβ <sub>1-40</sub> HTRF assay | p value |
|----------------------------------|---------|
| ctrl:SY5Yapp vs UA 1μM:SY5Yapp   | 0.9756  |

| G) qRT-PCR |                                    | Individual p value | Adjusted p value (FDR corrected) |
|------------|------------------------------------|--------------------|----------------------------------|
| CS         | ctrl:SY5Ymock vs. ctrl:SY5Yapp     | 0.6814             | 0.4770 ns                        |
|            | ctrl:SY5Ymock vs. UA 1μM:SY5Ymock  | 0.0022             | 0.0046 **                        |
|            | ctrl:SY5Ymock vs. UA 1μM:SY5Yapp   | 0.2201             | 0.1849 ns                        |
|            | ctrl:SY5Yapp vs. UA 1μM:SY5Ymock   | 0.0005             | 0.0022 **                        |
|            | ctrl:SY5Yapp vs. UA 1μM:SY5Yapp    | 0.1021             | 0.1072 ns                        |
|            | UA 1μM:SY5Ymock vs. UA 1μM:SY5Yapp | 0.0609             | 0.0853 ns                        |
| NDUFV1     | ctrl:SY5Ymock vs. ctrl:SY5Yapp     | 0.4840             | 0.1751 ns                        |
|            | ctrl:SY5Ymock vs. UA 1μM:SY5Ymock  | 0.0091             | 0.0048 **                        |
|            | ctrl:SY5Ymock vs. UA 1μM:SY5Yapp   | 0.0025             | 0.0017 **                        |
|            | ctrl:SY5Yapp vs. UA 1μM:SY5Ymock   | 0.0015             | 0.0016 **                        |

|              |                                    |          |               |
|--------------|------------------------------------|----------|---------------|
|              | ctrl:SY5Yapp vs. UA 1μM:SY5Yapp    | 0.0004   | 0.0009 ***    |
|              | UA 1μM:SY5Ymock vs. UA 1μM:SY5Yapp | 0.5003   | 0.1751 ns     |
| <b>COX5A</b> | ctrl:SY5Ymock vs. ctrl:SY5Yapp     | 0.0006   | 0.0010 **     |
|              | ctrl:SY5Ymock vs. UA 1μM:SY5Ymock  | 0.4774   | 0.2005 ns     |
|              | ctrl:SY5Ymock vs. UA 1μM:SY5Yapp   | 0.0010   | 0.0010 **     |
|              | ctrl:SY5Yapp vs. UA 1μM:SY5Ymock   | 0.0033   | 0.0023 **     |
|              | ctrl:SY5Yapp vs. UA 1μM:SY5Yapp    | 0.8462   | 0.2962 ns     |
|              | UA 1μM:SY5Ymock vs. UA 1μM:SY5Yapp | 0.0055   | 0.0029 **     |
|              |                                    |          |               |
| <b>ATP5D</b> | ctrl:SY5Ymock vs. ctrl:SY5Yapp     | 0.0244   | 0.0128 *      |
|              | ctrl:SY5Ymock vs. UA 1μM:SY5Ymock  | 0.6081   | 0.2128 ns     |
|              | ctrl:SY5Ymock vs. UA 1μM:SY5Yapp   | < 0.0001 | < 0.0001 **** |
|              | ctrl:SY5Yapp vs. UA 1μM:SY5Ymock   | 0.0750   | 0.0315 *      |
|              | ctrl:SY5Yapp vs. UA 1μM:SY5Yapp    | 0.0010   | 0.0007 ***    |
|              | UA 1μM:SY5Ymock vs. UA 1μM:SY5Yapp | < 0.0001 | < 0.0001 **** |
|              |                                    |          |               |
| <b>SIRT1</b> | ctrl:SY5Ymock vs. ctrl:SY5Yapp     | 0.9382   | 0.9851 ns     |
|              | ctrl:SY5Ymock vs. UA 1μM:SY5Ymock  | 0.0451   | 0.0710 ns     |
|              | ctrl:SY5Ymock vs. UA 1μM:SY5Yapp   | 0.0235   | 0.0610 ns     |
|              | ctrl:SY5Yapp vs. UA 1μM:SY5Ymock   | 0.0290   | 0.0610 ns     |
|              | ctrl:SY5Yapp vs. UA 1μM:SY5Yapp    | 0.0145   | 0.0610 ns     |
|              | UA 1μM:SY5Ymock vs. UA 1μM:SY5Yapp | 0.7188   | 0.9057 ns     |
|              |                                    |          |               |
| <b>CREB</b>  | ctrl:SY5Ymock vs. ctrl:SY5Yapp     | 0.1033   | 0.0813 ns     |
|              | ctrl:SY5Ymock vs. UA 1μM:SY5Ymock  | 0.5464   | 0.2869 ns     |
|              | ctrl:SY5Ymock vs. UA 1μM:SY5Yapp   | < 0.0001 | < 0.0001 **** |
|              | ctrl:SY5Yapp vs. UA 1μM:SY5Ymock   | 0.2666   | 0.1680 ns     |
|              | ctrl:SY5Yapp vs. UA 1μM:SY5Yapp    | < 0.0001 | < 0.0001 **** |
|              | UA 1μM:SY5Ymock vs. UA 1μM:SY5Yapp | < 0.0001 | < 0.0001 **** |
|              |                                    |          |               |
| <b>PGC1α</b> | ctrl:SY5Ymock vs. ctrl:SY5Yapp     | 0.1961   | 0.5462 ns     |
|              | ctrl:SY5Ymock vs. UA 1μM:SY5Ymock  | 0.7984   | > 0.9999 ns   |
|              | ctrl:SY5Ymock vs. UA 1μM:SY5Yapp   | 0.2378   | 0.5462 ns     |
|              | ctrl:SY5Yapp vs. UA 1μM:SY5Ymock   | 0.3016   | 0.5462 ns     |
|              | ctrl:SY5Yapp vs. UA 1μM:SY5Yapp    | 0.9938   | > 0.9999 ns   |
|              | UA 1μM:SY5Ymock vs. UA 1μM:SY5Yapp | 0.3468   | 0.5462        |
|              |                                    |          |               |
| <b>NRF1</b>  | ctrl:SY5Ymock vs. ctrl:SY5Yapp     | < 0.0001 | < 0.0001 **** |
|              | ctrl:SY5Ymock vs. UA 1μM:SY5Ymock  | 0.1003   | 0.0421 *      |
|              | ctrl:SY5Ymock vs. UA 1μM:SY5Yapp   | < 0.0001 | < 0.0001 **** |
|              | ctrl:SY5Yapp vs. UA 1μM:SY5Ymock   | < 0.0001 | < 0.0001 **** |
|              | ctrl:SY5Yapp vs. UA 1μM:SY5Yapp    | 0.7545   | 0.2641 ns     |
|              | UA 1μM:SY5Ymock vs. UA 1μM:SY5Yapp | < 0.0001 | < 0.0001 **** |
|              |                                    |          |               |
| <b>TFAM</b>  | ctrl:SY5Ymock vs. ctrl:SY5Yapp     | 0.4029   | 0.3173 ns     |
|              | ctrl:SY5Ymock vs. UA 1μM:SY5Ymock  | 0.8860   | 0.4651 ns     |
|              | ctrl:SY5Ymock vs. UA 1μM:SY5Yapp   | 0.0169   | 0.0177 *      |
|              | ctrl:SY5Yapp vs. UA 1μM:SY5Ymock   | 0.5112   | 0.3220 ns     |
|              | ctrl:SY5Yapp vs. UA 1μM:SY5Yapp    | 0.0016   | 0.0051 **     |
|              | UA 1μM:SY5Ymock vs. UA 1μM:SY5Yapp | 0.0147   | 0.0177 *      |
|              |                                    |          |               |
| <b>GABPa</b> | ctrl:SY5Ymock vs. ctrl:SY5Yapp     | 0.8011   | 0.4206 ns     |
|              | ctrl:SY5Ymock vs. UA 1μM:SY5Ymock  | 0.0515   | 0.0406 *      |
|              | ctrl:SY5Ymock vs. UA 1μM:SY5Yapp   | 0.0009   | 0.0015 **     |
|              | ctrl:SY5Yapp vs. UA 1μM:SY5Ymock   | 0.0223   | 0.0234 *      |
|              | ctrl:SY5Yapp vs. UA 1μM:SY5Yapp    | 0.0003   | 0.0008 ***    |
|              | UA 1μM:SY5Ymock vs. UA 1μM:SY5Yapp | 0.1041   | 0.0656 ns     |
|              |                                    |          |               |
| <b>ESRRa</b> | ctrl:SY5Ymock vs. ctrl:SY5Yapp     | 0.1142   | 0.0720 ns     |
|              | ctrl:SY5Ymock vs. UA 1μM:SY5Ymock  | 0.0225   | 0.0236 *      |
|              | ctrl:SY5Ymock vs. UA 1μM:SY5Yapp   | 0.0001   | 0.0004 ***    |
|              | ctrl:SY5Yapp vs. UA 1μM:SY5Ymock   | 0.4342   | 0.2280 ns     |
|              | ctrl:SY5Yapp vs. UA 1μM:SY5Yapp    | 0.0089   | 0.0140 *      |
|              | UA 1μM:SY5Ymock vs. UA 1μM:SY5Yapp | 0.0530   | 0.0418 *      |
|              |                                    |          |               |
| <b>ESRRy</b> | ctrl:SY5Ymock vs. ctrl:SY5Yapp     | 0.2063   | 0.0831 ns     |
|              | ctrl:SY5Ymock vs. UA 1μM:SY5Ymock  | 0.2376   | 0.0831 ns     |
|              | ctrl:SY5Ymock vs. UA 1μM:SY5Yapp   | < 0.0001 | < 0.0001 **** |

|                |                                    |          |               |
|----------------|------------------------------------|----------|---------------|
|                | ctrl:SY5Yapp vs. UA 1μM:SY5Ymock   | 0.0187   | 0.0098 **     |
|                | ctrl:SY5Yapp vs. UA 1μM:SY5Yapp    | < 0.0001 | < 0.0001 **** |
|                | UA 1μM:SY5Ymock vs. UA 1μM:SY5Yapp | 0.0012   | 0.0008 ***    |
| <b>MAP1LC3</b> | ctrl:SY5Ymock vs. ctrl:SY5Yapp     | 0.1322   | 0.1198 ns     |
|                | ctrl:SY5Ymock vs. UA 1μM:SY5Ymock  | 0.1426   | 0.1198 ns     |
|                | ctrl:SY5Ymock vs. UA 1μM:SY5Yapp   | 0.1009   | 0.1198 ns     |
|                | ctrl:SY5Yapp vs. UA 1μM:SY5Ymock   | 0.0049   | 0.0104 *      |
|                | ctrl:SY5Yapp vs. UA 1μM:SY5Yapp    | 0.0031   | 0.0104 *      |
|                | UA 1μM:SY5Ymock vs. UA 1μM:SY5Yapp | 0.8542   | 0.5979 ns     |
|                |                                    |          |               |
| <b>SQSTM1</b>  | ctrl:SY5Ymock vs. ctrl:SY5Yapp     | 0.0023   | 0.0122 *      |
|                | ctrl:SY5Ymock vs. UA 1μM:SY5Ymock  | 0.0230   | 0.0604 ns     |
|                | ctrl:SY5Ymock vs. UA 1μM:SY5Yapp   | 0.1601   | 0.2101 ns     |
|                | ctrl:SY5Yapp vs. UA 1μM:SY5Ymock   | 0.3717   | 0.3253 ns     |
|                | ctrl:SY5Yapp vs. UA 1μM:SY5Yapp    | 0.0733   | 0.1283 ns     |
|                | UA 1μM:SY5Ymock vs. UA 1μM:SY5Yapp | 0.3534   | 0.3253 ns     |
|                |                                    |          |               |

| <b>H) Autophagy assay kit</b>      | <b>Individual p value</b> | <b>Adjusted p value (FDR corrected)</b> |
|------------------------------------|---------------------------|-----------------------------------------|
| UA 1μM:SY5Ymock vs. UA 1μM:SY5Yapp | < 0.0001                  | < 0.0001 ****                           |
| UA 1μM:SY5Ymock vs. ctrl :SY5Ymock | 0.0851                    | 0.0149 *                                |
| UA 1μM:SY5Ymock vs. ctrl :SY5Yapp  | < 0.0001                  | < 0.0001 ****                           |
| UA 1μM:SY5Yapp vs. ctrl :SY5Ymock  | < 0.0001                  | < 0.0001 ****                           |
| UA 1μM:SY5Yapp vs. ctrl :SY5Yapp   | 0.0124                    | 0.0026 **                               |
| ctrl :SY5Ymock vs. ctrl :SY5Yapp   | < 0.0001                  | < 0.0001 ****                           |

| <b>I) Western Blot</b> |                                    | <b>Individual p value</b> | <b>Adjusted p value (FDR corrected)</b> |
|------------------------|------------------------------------|---------------------------|-----------------------------------------|
| <b>LC3B-I/β-Actin</b>  | ctrl:SY5Ymock vs. ctrl:SY5Yapp     | 0.0656                    | 0.4133 ns                               |
|                        | ctrl:SY5Ymock vs. UA 1μM:SY5Ymock  | 0.6648                    | 0.6981 ns                               |
|                        | ctrl:SY5Ymock vs. UA 1μM:SY5Yapp   | 0.3593                    | 0.5659 ns                               |
|                        | ctrl:SY5Yapp vs. UA 1μM:SY5Ymock   | 0.1515                    | 0.4774 ns                               |
|                        | ctrl:SY5Yapp vs. UA 1μM:SY5Yapp    | 0.3362                    | 0.5659 ns                               |
|                        | UA 1μM:SY5Ymock vs. UA 1μM:SY5Yapp | 0.6256                    | 0.6981 ns                               |
| <b>LC3B-II/β-Actin</b> | ctrl:SY5Ymock vs. ctrl:SY5Yapp     | 0.0264                    | 0.0930 ns                               |
|                        | ctrl:SY5Ymock vs. UA 1μM:SY5Ymock  | 0.9595                    | > 0.9999 ns                             |
|                        | ctrl:SY5Ymock vs. UA 1μM:SY5Yapp   | 0.3904                    | 0.5273 ns                               |
|                        | ctrl:SY5Yapp vs. UA 1μM:SY5Ymock   | 0.0295                    | 0.0930 ns                               |
|                        | ctrl:SY5Yapp vs. UA 1μM:SY5Yapp    | 0.1520                    | 0.3193 ns                               |
|                        | UA 1μM:SY5Ymock vs. UA 1μM:SY5Yapp | 0.4185                    | 0.5273 ns                               |
| <b>p62//β-Actin</b>    | ctrl:SY5Ymock vs. ctrl:SY5Yapp     | 0.9035                    | 0.9486 ns                               |
|                        | ctrl:SY5Ymock vs. UA 1μM:SY5Ymock  | 0.5618                    | 0.8848 ns                               |
|                        | ctrl:SY5Ymock vs. UA 1μM:SY5Yapp   | 0.4712                    | 0.8848 ns                               |
|                        | ctrl:SY5Yapp vs. UA 1μM:SY5Ymock   | 0.4840                    | 0.8848 ns                               |
|                        | ctrl:SY5Yapp vs. UA 1μM:SY5Yapp    | 0.4012                    | 0.8848 ns                               |
|                        | UA 1μM:SY5Ymock vs. UA 1μM:SY5Yapp | 0.8869                    | 0.9486 ns                               |
